# Supplementary material for: Methionine biosynthesis and transport are functionally redundant for the growth and virulence of Salmonella Typhimurium
Source: PubMed Central journal article supplement (PMC6005444; doi:10.1074/jbc.ra118.002592), 2018-05-02

## SUPPLEMENTARY INFORMATION

### **Methionine biosynthesis and transport are functionally redundant for the growth and virulence of *Salmonella* Typhimurium**

Asma Ul Husna<sup>1</sup>, Nancy Wang<sup>1\*</sup>, Simon A. Cobbold<sup>2</sup>, Hayley J. Newton<sup>1</sup>, Dianna M. Hocking<sup>1</sup>, Jonathan J. Wilksch<sup>1</sup>, Timothy A. Scott<sup>1,3</sup>, Mark R. Davies<sup>1</sup>, Jay C. Hinton<sup>4</sup>, Jai J. Tree<sup>1,5</sup>, Trevor Lithgow<sup>6</sup>, Malcolm J. McConville<sup>2^</sup>, Richard A. Strugnell<sup>1\*</sup>

#### **Materials included:**

Table S1: Survival analysis of *S. Typhimurium* wild-type and  $\Delta metB$  mutant in different types of media supplemented with a variety of substances for different times

Supplementary Figure S1: Expression of genes in the *de novo* Met biosynthetic pathway of *S. Typhimurium* during stresses in relevant to *in vivo* infection

Supplementary Figure S2: The presence of Met in tissue culture DMEM media restores the growth of mutants in the *de novo* Met biosynthesis pathway in HeLa cells

Supplementary Figure S3: *De novo* Met biosynthetic mutants are not attenuated for oral infection in mice.

Supplementary Figure S4: *S. Typhimurium* mutants with combined deficiency for biosynthesis and high-affinity transport of Met are attenuated for oral infection in mice.

Supplementary Figure S5: *S. Typhimurium*  $\Delta metB$  mutant shows slower growth in high concentration of bile salt.

**Table S1. Survival analysis of *S. Typhimurium* wild-type and  $\Delta metB$  mutant in different types of media supplemented with a variety of substances for different times.**

| <b>Different types of substances with different time-point</b>                                                                                        | <b>Difference in viable counts between wild-type and <math>\Delta metB</math></b> |
|-------------------------------------------------------------------------------------------------------------------------------------------------------|-----------------------------------------------------------------------------------|
| 3.5% SDS, in LB, incubated for 2, 4, 6, 8 and 10 hours                                                                                                | No difference                                                                     |
| 0.5 mM EDTA, in LB, for 2, 4, 6, 8 and 10 hours                                                                                                       | No difference                                                                     |
| 3.5% SDS and 0.5 mM EDTA, in LB, for 2, 4, 6, 8 and 10 hours                                                                                          | No difference                                                                     |
| Different lysozyme concentration (0.5, 1, 2, 4, 8, 16 mg/ml) in LB, incubated for 10, 20, 30, 40, 60, 80 and 110 min after treatment with 0.5 mM EDTA | No difference                                                                     |
| Different lysozyme concentration (0.5, 1, 2, 4, 8, 16 mg/ml) in LB, incubated for 10, 20, 30, 40, 60, 80 and 110 min after treatment with 1 mM EDTA   | No difference                                                                     |
| Distilled water for ten days                                                                                                                          | No difference                                                                     |
| Fasted State Simulated Intestinal Fluid (FaSSIF) for seven days                                                                                       | No difference                                                                     |

## Figure legends

**Supplementary Figure S1. Expression of genes in the *de novo* Met biosynthetic pathway of *S. Typhimurium* during stresses in relevant to *in vivo* infection.** Expression data were compiled from the SalComMac database ([http://bioinf.gen.tcd.ie/cgi-bin/salcom.pl?db=salcom\\_mac\\_HL](http://bioinf.gen.tcd.ie/cgi-bin/salcom.pl?db=salcom_mac_HL)) as reported by Kröger *et al* (29) and Srikumar *et al.* (30), and provide detailed descriptions of media composition and stress. **A)** Absolute expression values for genes in the *de novo* Met biosynthetic pathway (transcripts per million). Growth conditions indicated below the heatmap are EEP (early exponential phase), MEP (mid exponential phase), LEP (late exponential phase), ESP (early stationary phase), LEP (late stationary phase), NonSPI2 (growth in PCN media (73) [pH 7.4 25mM Pi] to OD<sub>600</sub> = 0.3), InSPI2 (growth in PCN medium [pH 5.8, 0.4 mM Pi] to OD<sub>600</sub> = 0.3), InSPI2 low Mg<sup>2+</sup> (growth in PCN medium [InSPI2] with 10 mM MgSO<sub>4</sub> to OD<sub>600</sub> = 0.3), Intra-macrophages (infection of RAW264.7 macrophages for 8 hours, at a bacteria:macrophage ratio of 100:1). **B)** Relative expression (log<sub>2</sub> fold change) of genes in the *de novo* Met biosynthetic pathway. Gene expression is shown relative to the first column in each block of samples (designated “normalizer”). Stress conditions are as described for absolute expression (A) and described in detail in (29).

**Supplementary Figure S2. The presence of Met in tissue culture DMEM media restores the growth of mutants in the *de novo* Met biosynthesis pathway in HeLa cells.** HeLa cells were grown to a monolayer and infected with *S. Typhimurium* WT or mutant strains at a multiplicity of infection (MOI) of 5-10, in DMEM-complete media that contains 200 μM Met. The intracellular bacterial load at 2 hrs post-infection is expressed as “1” and used as the reference point to calculate fold-change of intracellular bacterial number at subsequent time points. Data are pooled from three independent experiments. Bars represent the mean cfu and error bars show the data range. Unpaired *t*-test was used to compare the intracellular load of WT and mutant strains at 10 hrs post-infection, and multiple comparisons were corrected using the Bonferroni-Dunn method; none of the comparisons yielded a *p*-value below 0.05.

**Supplementary Figure S3. *De novo* Met biosynthetic mutants are not attenuated for oral infection in mice.** C57BL/6 mice were oral gavaged with 10% sodium bicarbonate immediately before oral gavage with 5×10<sup>7</sup>cfu of indicated strains of *S. Typhimurium*. The bacterial load in the A) liver and B) spleen were determined at day 6 post-infection. Symbols represent data from individual animals, and horizontal lines represent the geometric mean of each group. One-way ANOVA with Bonferroni post-tests was used for statistical analyses comparing each pair of data groups, and none of the comparisons yielded a *p*-value below 0.05.

**Supplementary Figure S4. *S. Typhimurium* mutants with combined deficiency for biosynthesis and high-affinity transport of Met are attenuated for oral infection in mice.** C57BL/6 mice were oral gavaged with 10% sodium bicarbonate immediately before oral gavage with 5×10<sup>7</sup>cfu of indicated strains of *S. Typhimurium*. The bacterial load in the A) liver and B) spleen were determined at day 6 post-infection. Symbols represent data from individual animals, and horizontal lines represent the geometric mean of each group. Data are pooled from three independent experiments. One-way ANOVA with Bonferroni post-tests was used for statistical analyses comparing each pair of data groups, and none of the comparisons yielded a *p*-value below 0.05.

**Supplementary Figure S5. *S. Typhimurium*  $\Delta metB$  mutant shows slower growth in high concentration of bile salt.** The growth of *S. Typhimurium* wild-type and  $\Delta metB$  mutant was tested in MacConkey broth supplemented with 0.6% bile salt. Bars represent the mean optical density reading at 600 nm (OD<sub>600</sub>) of three biological replicates for each strain, and error bars indicate the data range. Two-way ANOVA with Bonferroni’s multiple comparison test was used for statistical analyses, \*\*\*, *p*<0.001; \*\*\*\*, *p*< 0.0001; ns, *p*>0.05.

**A**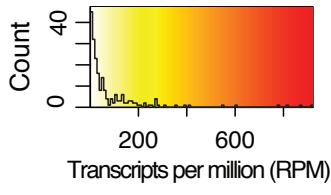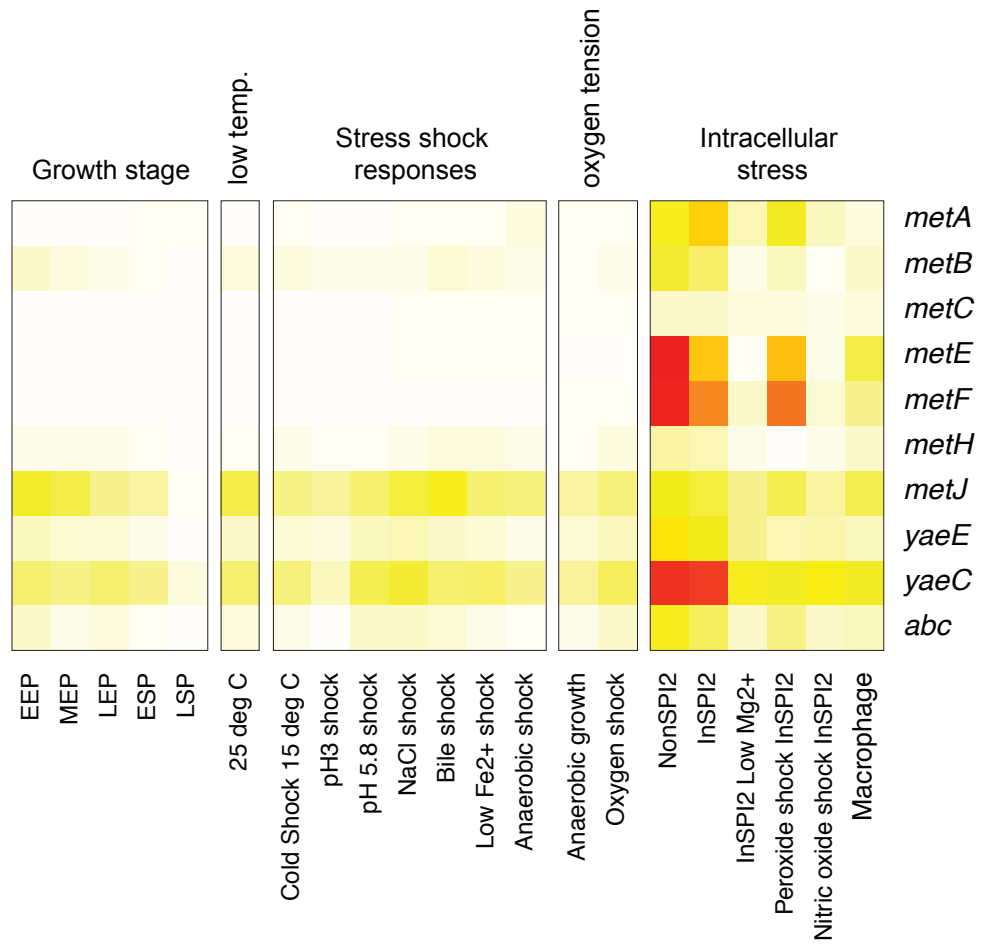**B**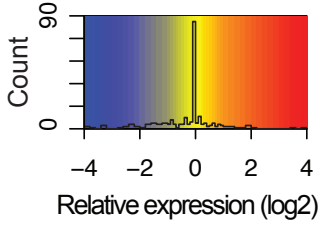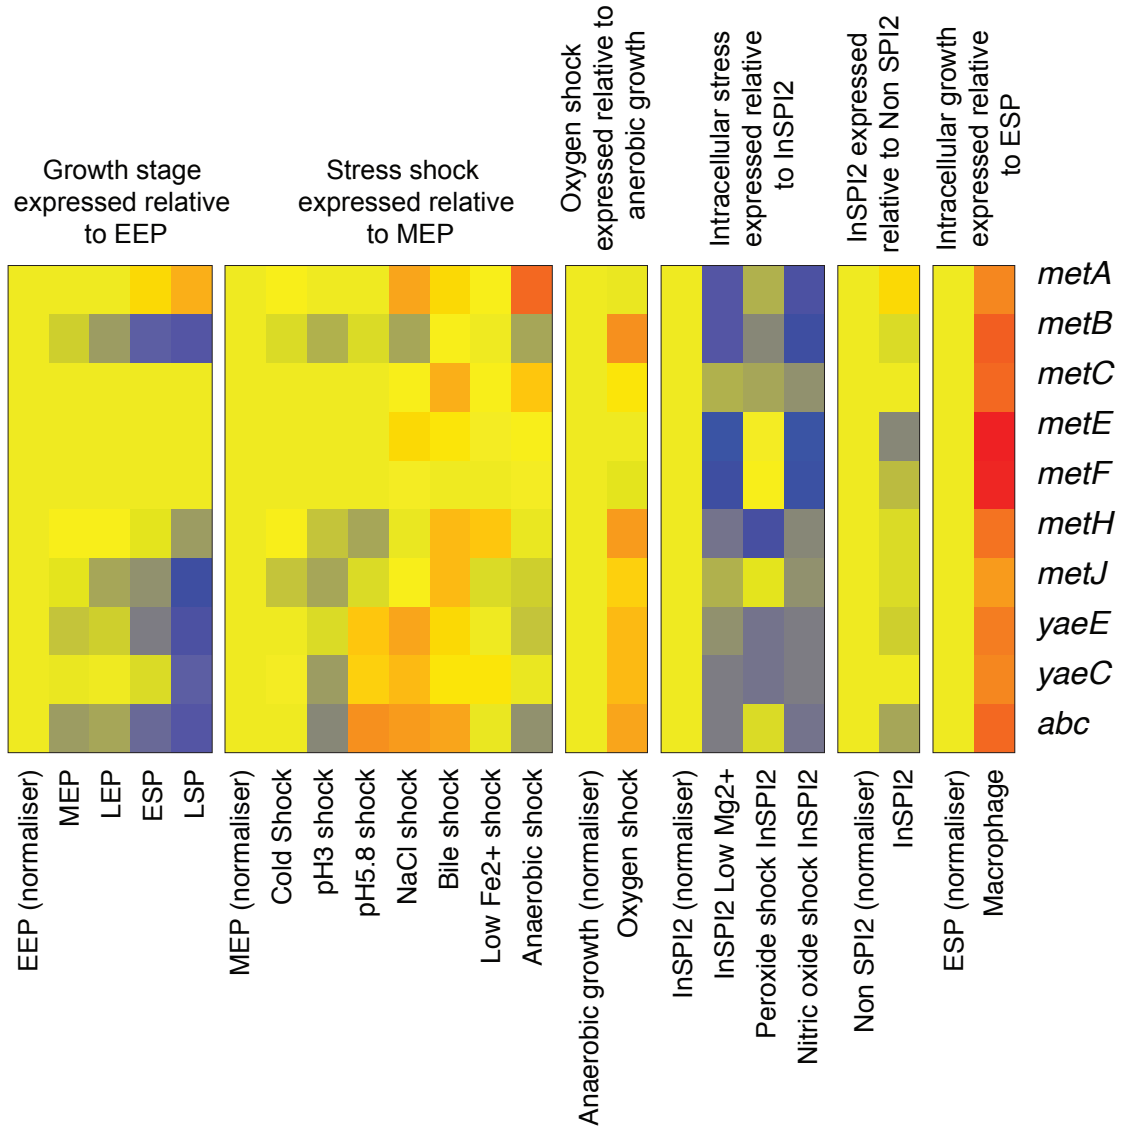

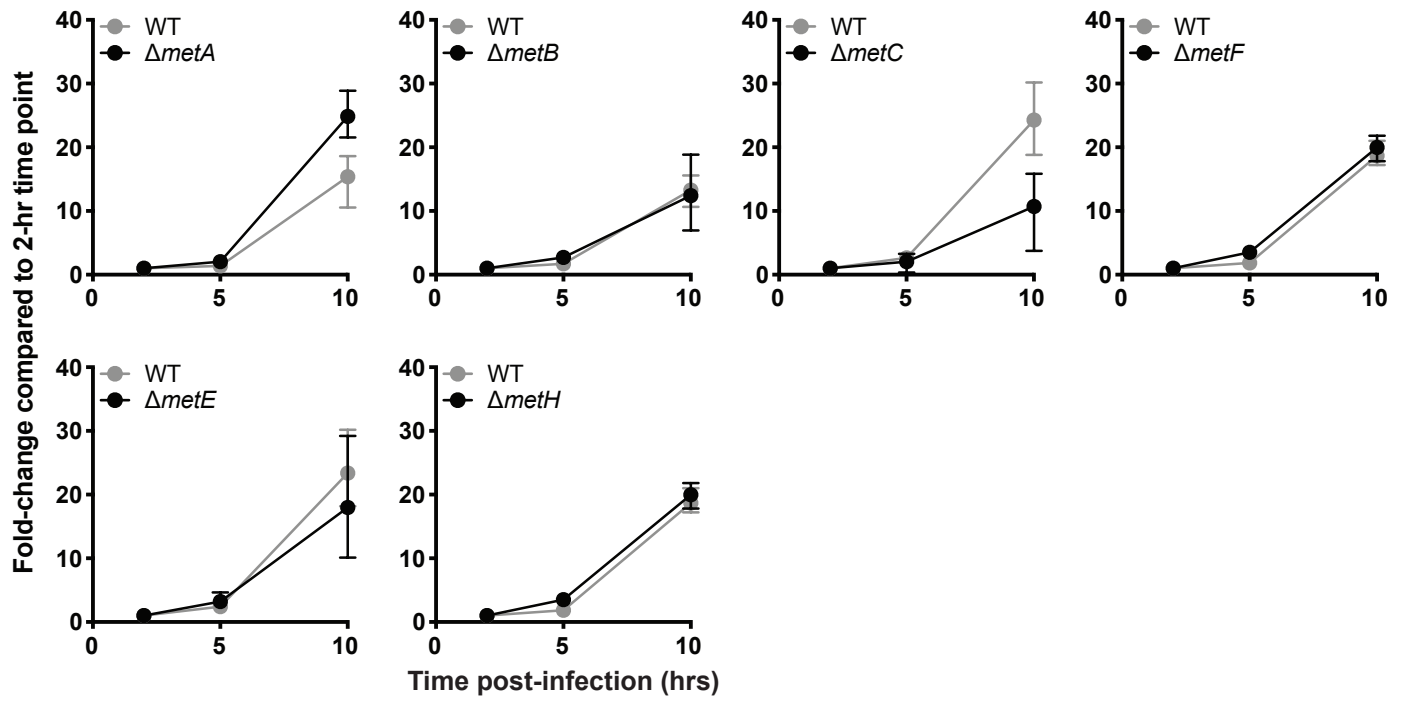

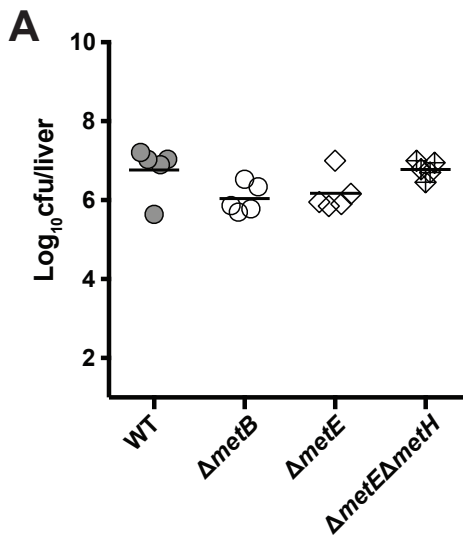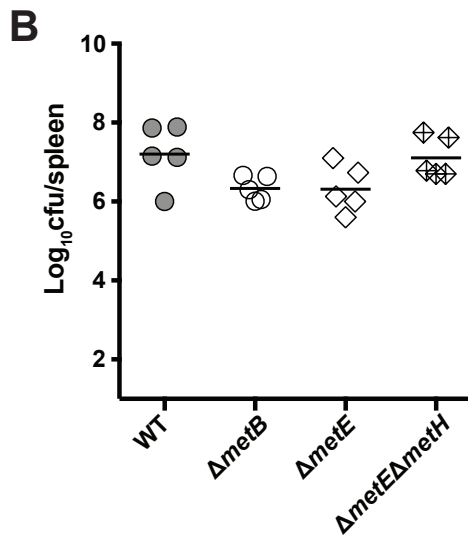

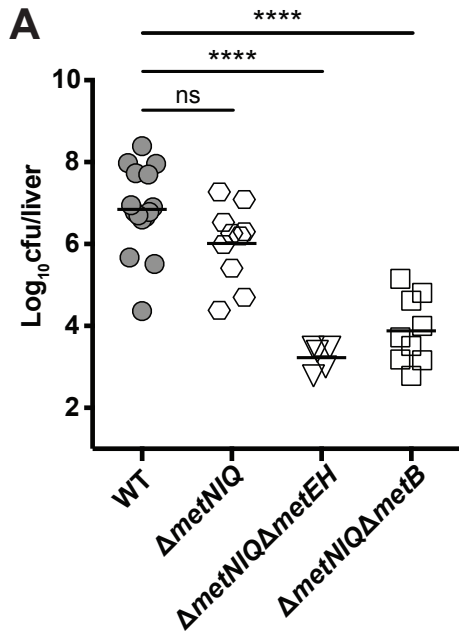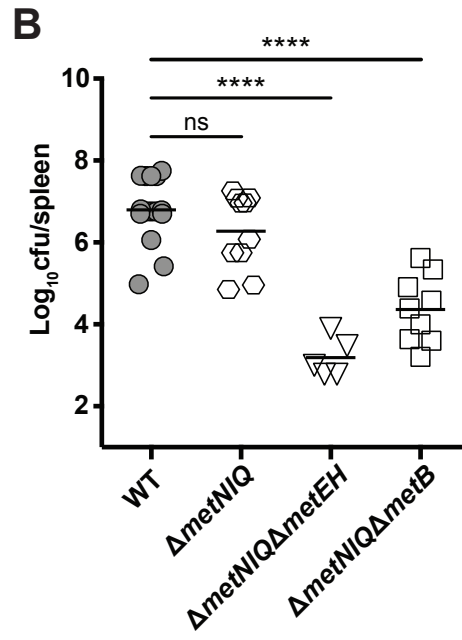

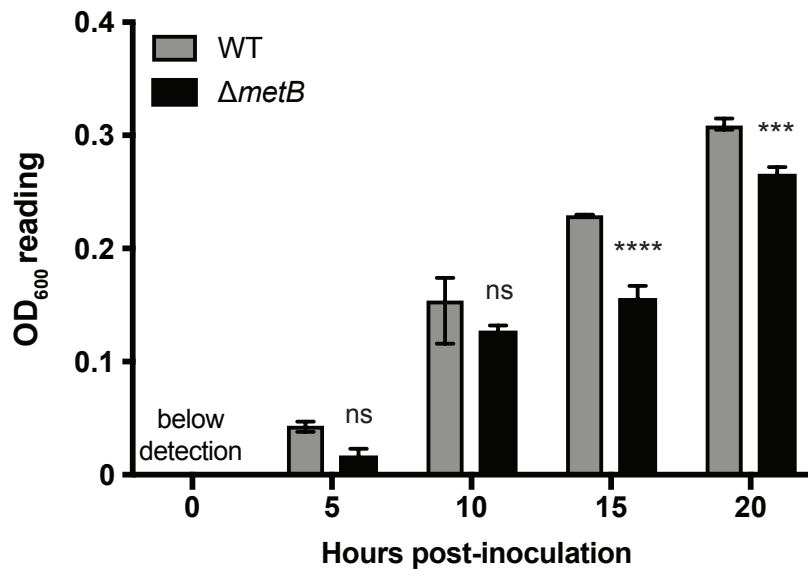

Supplement: supp_RA118.002592_136246_1_supp_129713_p7x5yw.pdf [file supp_RA118.002592_136246_1_supp_129713_p7x5yw.pdf]
